# Supplementary material
Source: Springer Nature journal article supplement (https://www.springerprofessional.de/resource/supplementary/13638_2012_589_MOESM12_ESM.pdf/11898706)
Supplement: MOESM12 [file 11898706]

Table 2 Simulation Parameters

| Parameter                            | Value                                                                                                                            |
|--------------------------------------|----------------------------------------------------------------------------------------------------------------------------------|
| Macrocell radius (m)                 | 500                                                                                                                              |
| Femtocell radius (m)                 | 50                                                                                                                               |
| Number of femtocells                 | 0-100                                                                                                                            |
| Number of macro UEs                  | 25                                                                                                                               |
| Modulation                           | <i>UE-Femto BS link: Adaptive modulation (QPSK, 16 QAM)</i><br><i>Femto BS-Macro BS link: Adaptive modulation (QPSK, 16 QAM)</i> |
| Shadowing std UE-Macro BS (dB)       | 10                                                                                                                               |
| Shadowing std UE-Femto BS (dB)       | 10                                                                                                                               |
| Shadowing std femto BS-macro BS (dB) | 6                                                                                                                                |
| UE transmit SNR (dBm)                | 23                                                                                                                               |
| Femto transmit SNR (dBm)             | 23                                                                                                                               |
| Receiver diversity gain (dB)         | 3                                                                                                                                |
| Penetration loss (dB)                | 20                                                                                                                               |
| Results                              | Power reduction, macro UE data rate                                                                                              |
